# Supplementary material for: The ATENción Plena en Enfermedad de Alzheimer (ATENEA—Mindfulness in Alzheimer’s Disease) Program for Caregivers: Study Protocol for a Randomized Controlled Trial
Source: MDPI journal article supplement (doi:10.3390/healthcare10030542), 2022-03-15
Supplement: s1 [file s1]

**ENCUESTA DE OPINIÓN A CUIDADORES DE PERSONAS CON ENFERMDAD DE ALZHEIMER SOBRE LA DOCENCIA EN EL CURSO: PROGRAMA DE CUIDADO DE LA SALUD BASADO EN MINDFULNESS**

Indique su grado de acuerdo con las siguientes afirmaciones:

- A: Totalmente en desacuerdo  
B: En desacuerdo  
C: Ni de acuerdo ni en desacuerdo  
D: De acuerdo  
E: Totalmente de acuerdo  
F: No contesta

|                                                                                                       | A | B | C | D | E | F |
|-------------------------------------------------------------------------------------------------------|---|---|---|---|---|---|
| El profesor proporciona información clara sobre los contenidos del curso: objetivos, programa, etc... |   |   |   |   |   |   |
| El profesor explica de forma clara y organizada                                                       |   |   |   |   |   |   |
| La forma de impartir la clase el profesor consigue motivarme y despertar el interés por el curso      |   |   |   |   |   |   |
| Las prácticas realizadas durante el curso y en casa ayudan a comprender mejor los contenidos teóricos |   |   |   |   |   |   |
| El profesor ha resuelto adecuadamente las dudas que se han planteado en clase                         |   |   |   |   |   |   |

Indique su satisfacción:

- 0: Totalmente insatisfecho  
10: Totalmente satisfecho

[illegible]

Por favor, escriba aquí las sugerencias o comentarios que desee realizar:

---

---

---

---

---

---

---

---
